# Supplementary material for: Application of ZnO-Nd Nano-Photocatalyst for the Reactive Red 198 Dye Decolorization in the Falling-Film Photocatalytic Reactor
Source: MDPI journal article supplement (doi:10.3390/toxics9100254), 2021-10-08
Supplement: s1 [file s1]

# Supplementary Materials: Application of ZnO-Nd Nano-Photocatalyst for the Reactive Red 198 Dye Decolorization in the Falling-Film Photocatalytic Reactor

Fatemeh Biglar, Amirreza Talaiekhosani \*, Farham Aminsharei, Junboum Park, Anahita Barghi and Shahabaldin Rezanian \*

**Table S1.** Regression analysis and significance of the components in the quadratic model for RR198 degradation by ZnO-Nd.

| Std | Run | Factor 1<br>A: Catalyst dosage | Factor 2<br>B: pH | Factor 3<br>C: [Initial dye concentration] | Response 1<br>%R1 |
|-----|-----|--------------------------------|-------------------|--------------------------------------------|-------------------|
| 8   | 1   | 0.16                           | 7                 | 30                                         | 25.72             |
| 7   | 2   | 0.04                           | 7                 | 30                                         | 14.64             |
| 9   | 3   | 0.04                           | 5                 | 20                                         | 19.79             |
| 14  | 4   | 0.1                            | 5                 | 30                                         | 31.37             |
| 15  | 5   | 0.1                            | 5                 | 20                                         | 56.13             |
| 4   | 6   | 0.16                           | 7                 | 10                                         | 73.24             |
| 2   | 7   | 0.16                           | 3                 | 10                                         | 56.32             |
| 3   | 8   | 0.04                           | 7                 | 10                                         | 27.15             |
| 17  | 9   | 0.1                            | 5                 | 20                                         | 60.3              |
| 18  | 10  | 0.1                            | 5                 | 20                                         | 60.46             |
| 12  | 11  | 0.1                            | 7                 | 20                                         | 46.51             |
| 16  | 12  | 0.1                            | 5                 | 20                                         | 56.03             |
| 6   | 13  | 0.16                           | 3                 | 30                                         | 15.17             |
| 13  | 14  | 0.1                            | 5                 | 10                                         | 80.3              |
| 19  | 15  | 0.1                            | 5                 | 20                                         | 59.67             |
| 1   | 16  | 0.04                           | 3                 | 10                                         | 17.23             |
| 10  | 17  | 0.16                           | 5                 | 20                                         | 57.63             |
| 5   | 18  | 0.04                           | 3                 | 30                                         | 9.18              |
| 11  | 19  | 0.1                            | 3                 | 20                                         | 20.88             |

**Table S2.** Analysis of variance of the developed quadratic model for RR198 degradation by ZnO-Nd in presence of UV light.

| Source               | Sum of Squares | df | Mean Square | F Value | p-value Prob > F |
|----------------------|----------------|----|-------------|---------|------------------|
| <b>Model</b>         | 8488.35        | 9  | 943.15      | 16.98   | 0.0001           |
| <b>A-cat%</b>        | 1962.52        | 1  | 1962.52     | 35.32   | 0.0002           |
| <b>B-pH</b>          | 468.95         | 1  | 468.95      | 8.44    | 0.0174           |
| <b>C-[dye]</b>       | 2501.46        | 1  | 2501.46     | 45.02   | < 0.0001         |
| <b>AB</b>            | 18.27          | 1  | 18.27       | 0.33    | 0.5804           |
| <b>AC</b>            | 579.87         | 1  | 579.87      | 10.44   | 0.0103           |
| <b>BC</b>            | 14.66          | 1  | 14.66       | 0.26    | 0.6198           |
| <b>A<sup>2</sup></b> | 454.33         | 1  | 454.33      | 8.18    | 0.0188           |
| <b>B<sup>2</sup></b> | 876.44         | 1  | 876.44      | 15.78   | 0.0032           |
| <b>C<sup>2</sup></b> | 48.90          | 1  | 48.90       | 0.88    | 0.3727           |

**Table S3.** Coefficient of regression and standard errors.

| Factor         | Coefficient Estimate | Standard Error |
|----------------|----------------------|----------------|
| Intercept      | 55.45                | 2.73           |
| A-cat%         | 14.01                | 2.36           |
| B-pH           | 6.85                 | 2.36           |
| C-[dye]        | −15.82               | 2.36           |
| AB             | 1.51                 | 2.64           |
| AC             | −8.51                | 2.64           |
| BC             | −1.35                | 2.64           |
| A <sup>2</sup> | −12.89               | 4.51           |
| B <sup>2</sup> | −17.91               | 4.51           |
| C <sup>2</sup> | 4.23                 | 4.51           |
